# Supplementary material for: Using a multi-layer snow model for transient paleo-studies: surface mass balance evolution during the Last Interglacial
Source: Copernicus journal article supplement (doi:10.5194/cp-21-27-2025), 2025-01-07
Supplement: Supplementary file 1 [file cp-21-27-2025-supplement.pdf]

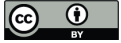

*Supplement of*

## **Using a multi-layer snow model for transient paleo-studies: surface mass balance evolution during the Last Interglacial**

**Thi-Khanh-Dieu Hoang et al.**

*Correspondence to:* Thi-Khanh-Dieu Hoang ([dieu.hoang@lsce.ipsl.fr](mailto:dieu.hoang@lsce.ipsl.fr))

The copyright of individual parts of the supplement might differ from the article licence.

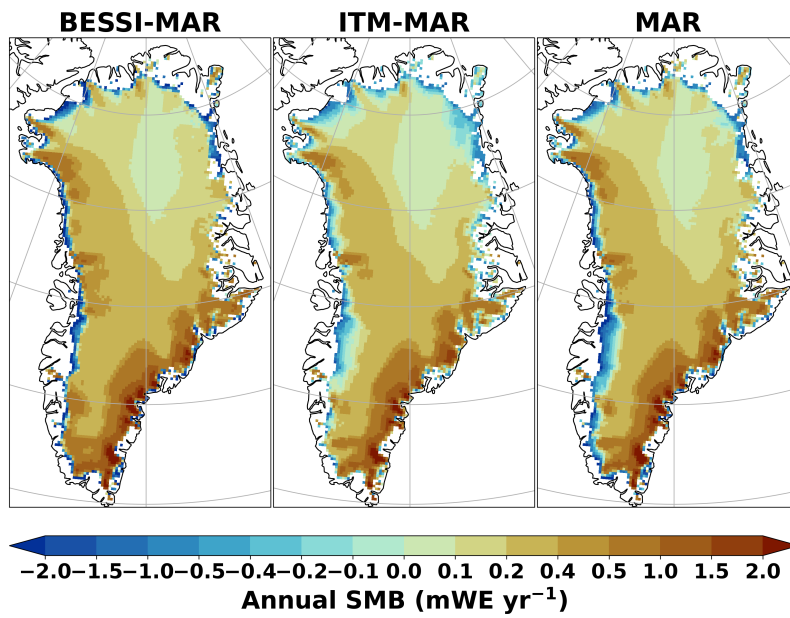

**Figure S1.** Annual mean SMB values (in  $\text{mWE yr}^{-1}$ ) of BESSI-MAR and ITM-MAR compared to MAR for Greenland Ice Sheet.

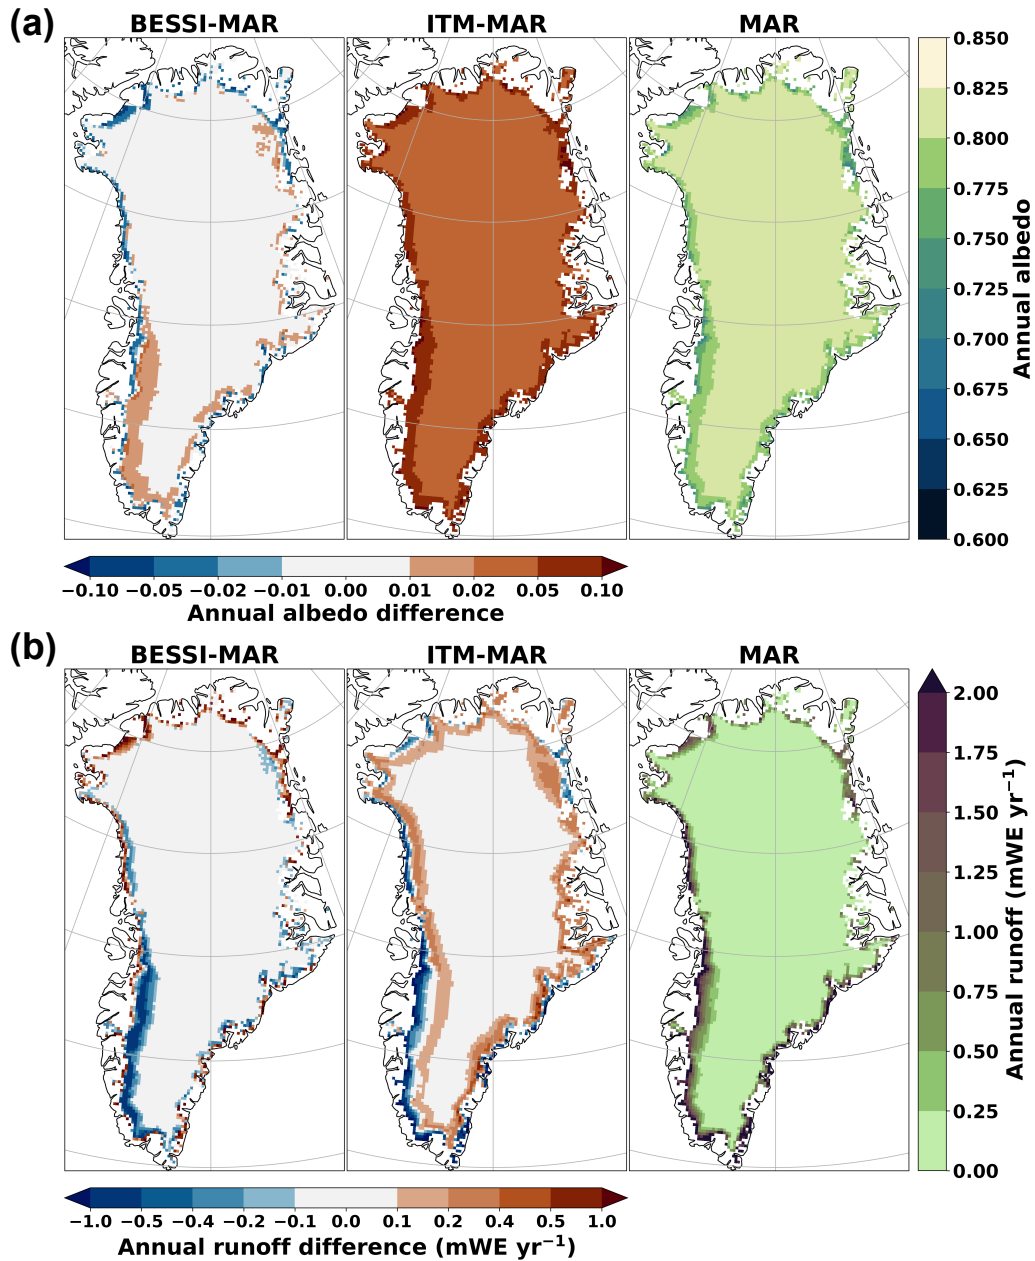

**Figure S2.** Annual anomalies (in  $\text{mWE yr}^{-1}$ ) of BESSI-MAR and ITM-MAR with respect to MAR in term of (a) albedo and (b) runoff for Greenland Ice Sheet. The reference, MAR, is shown in absolute annual values.

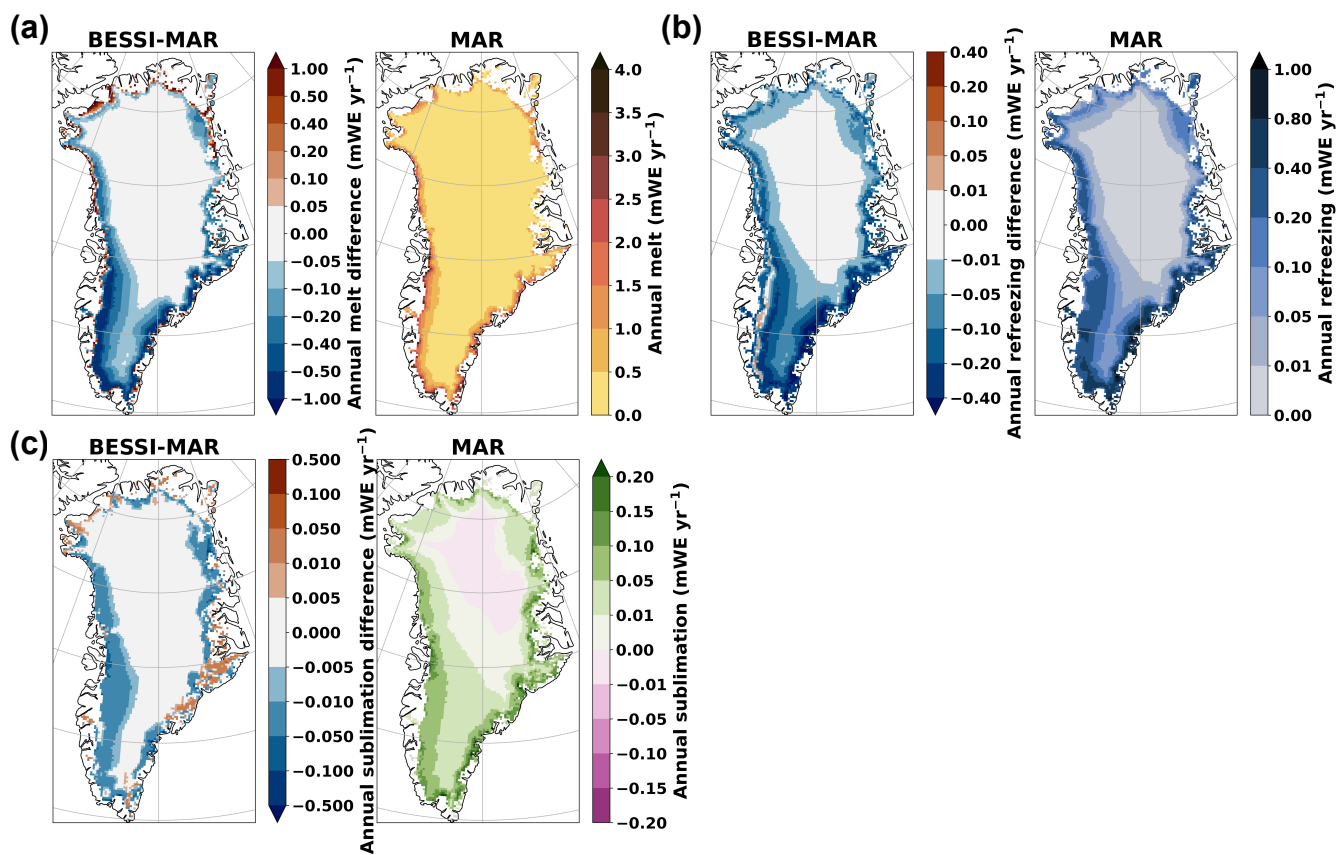

**Figure S3.** Comparison of BESSI-MAR to MAR in term of annual (a) melt, (b) refreezing and (c) sublimation (in mWE yr<sup>-1</sup>) for Greenland Ice Sheet. The reference, MAR, is shown in absolute annual values.



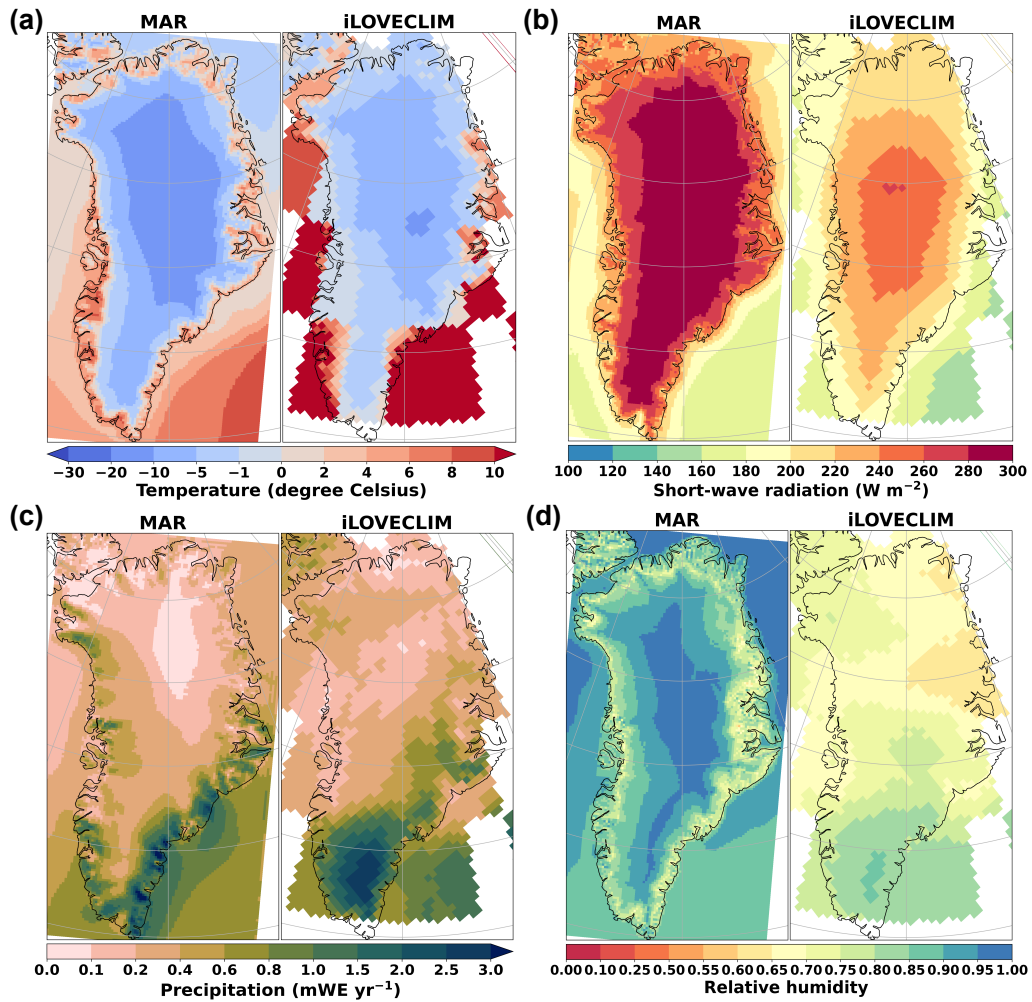

**Figure S4.** Mean value of climate variables including (a) summer temperature (in degree Celsius), (b) summer shortwave radiation (in  $W m^{-2}$ ), (c) annual precipitation (in  $mWE yr^{-1}$ ) and (d) annual relative humidity of MAR and iLOVECLIM for Greenland Ice Sheet. The summer months here are June-July-August (JJA).

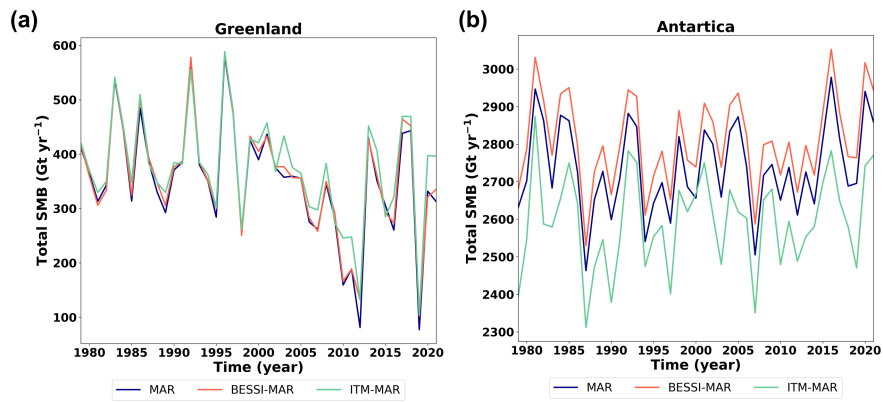

**Figure S5.** Temporal variation of the yearly mean total SMB integrated on present-day ice sheet extent (in  $\text{Gt yr}^{-1}$ ) during 1979-2021 of MAR, BESSI-MAR and ITM-MAR for (a) Greenland and (b) Antarctica.

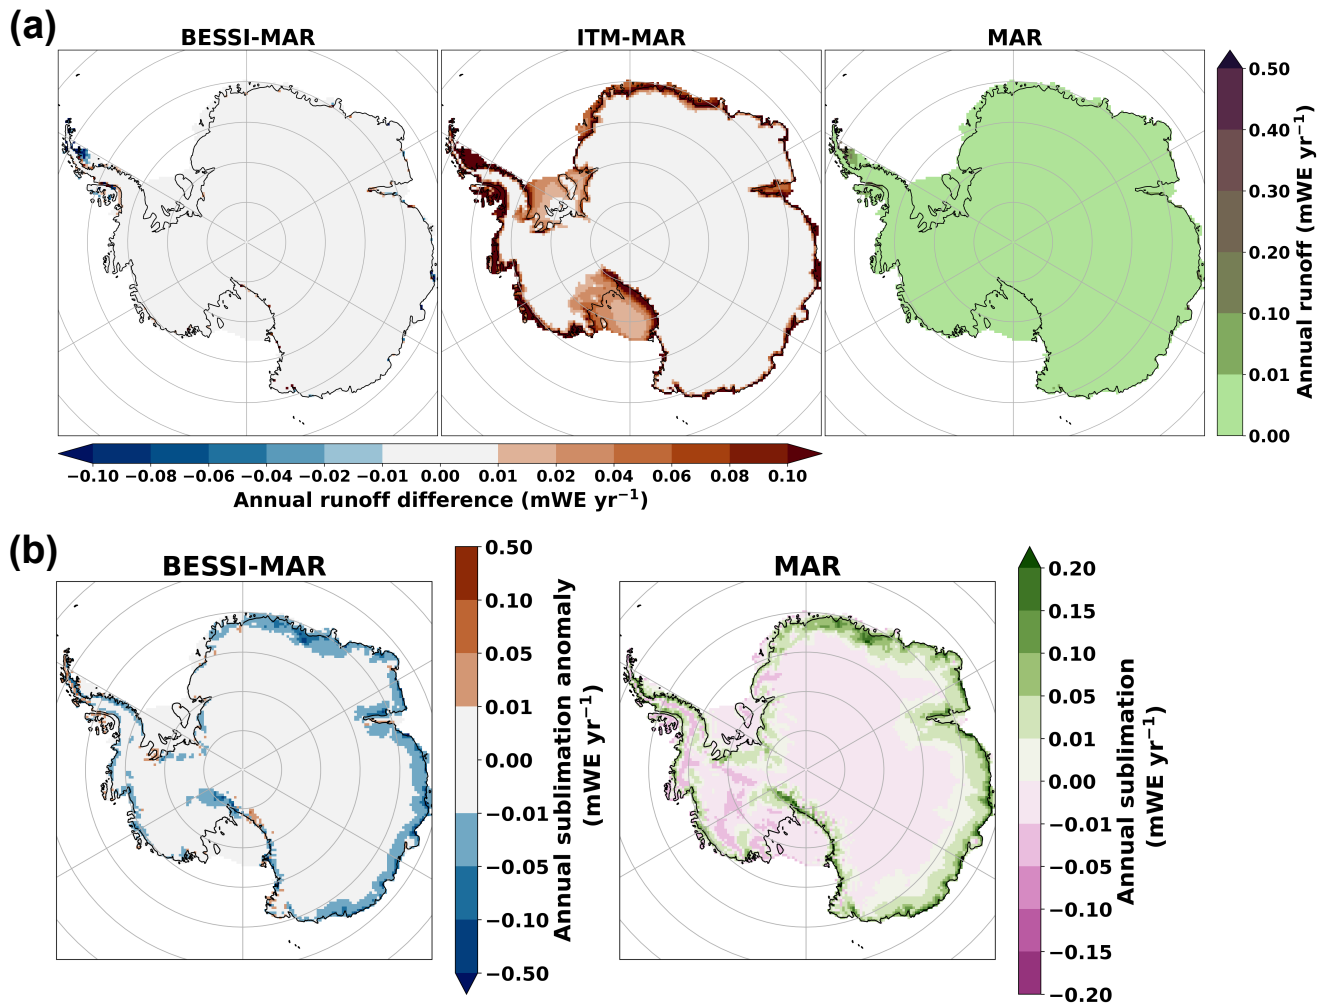

**Figure S6.** Annual anomalies (in mWE yr<sup>-1</sup>) of BESSI-MAR and ITM-MAR with respect to MAR in term of (a) runoff and (b) sublimation for Antarctic Ice Sheet. The reference, MAR, is shown in absolute annual values.

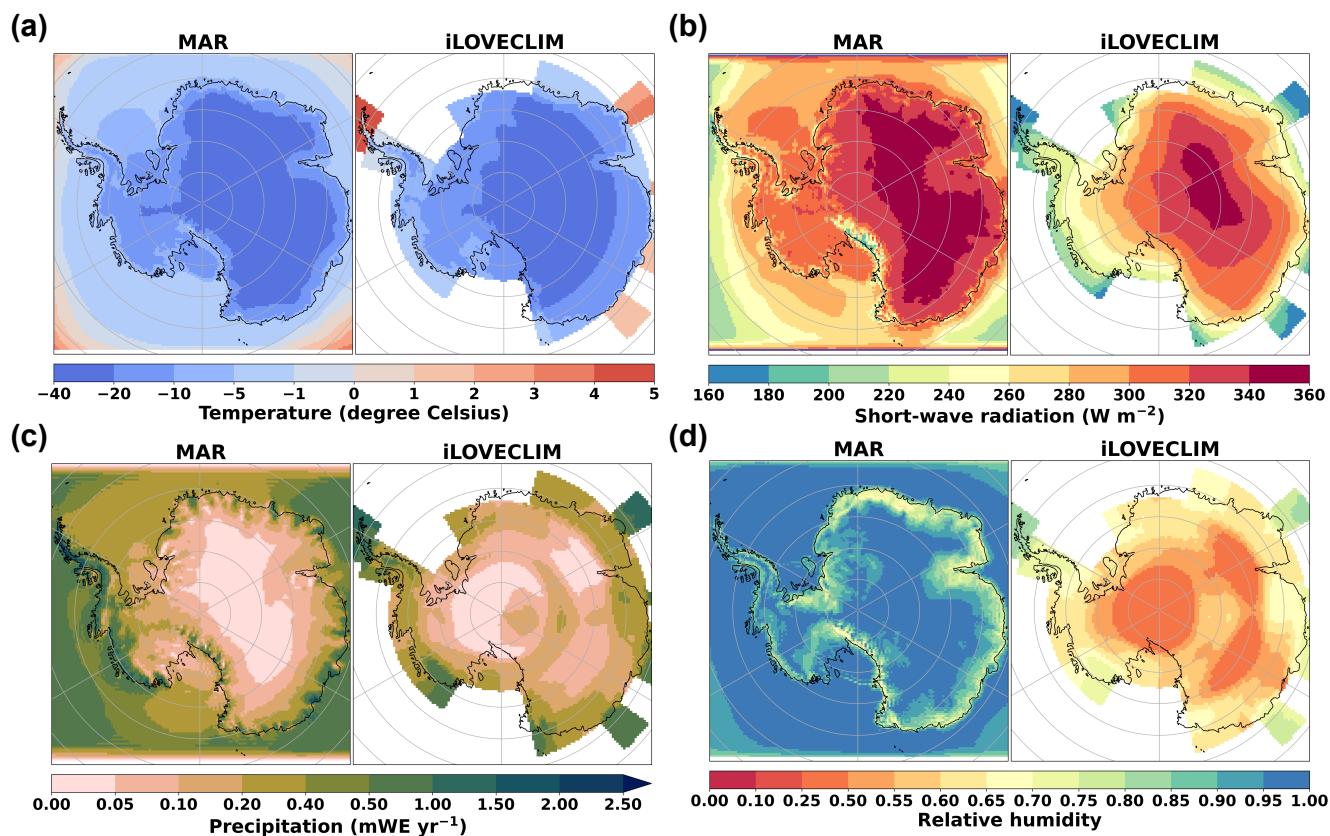

**Figure S7.** Mean value of climate variables including (a) summer temperature (in degree Celsius), (b) summer shortwave radiation (in  $\text{W m}^{-2}$ ), (c) annual precipitation (in  $\text{mWE yr}^{-1}$ ) and (d) annual relative humidity of MAR and iLOVECLIM for Antarctic Ice Sheet. The summer months here are December-January-February (DJF).

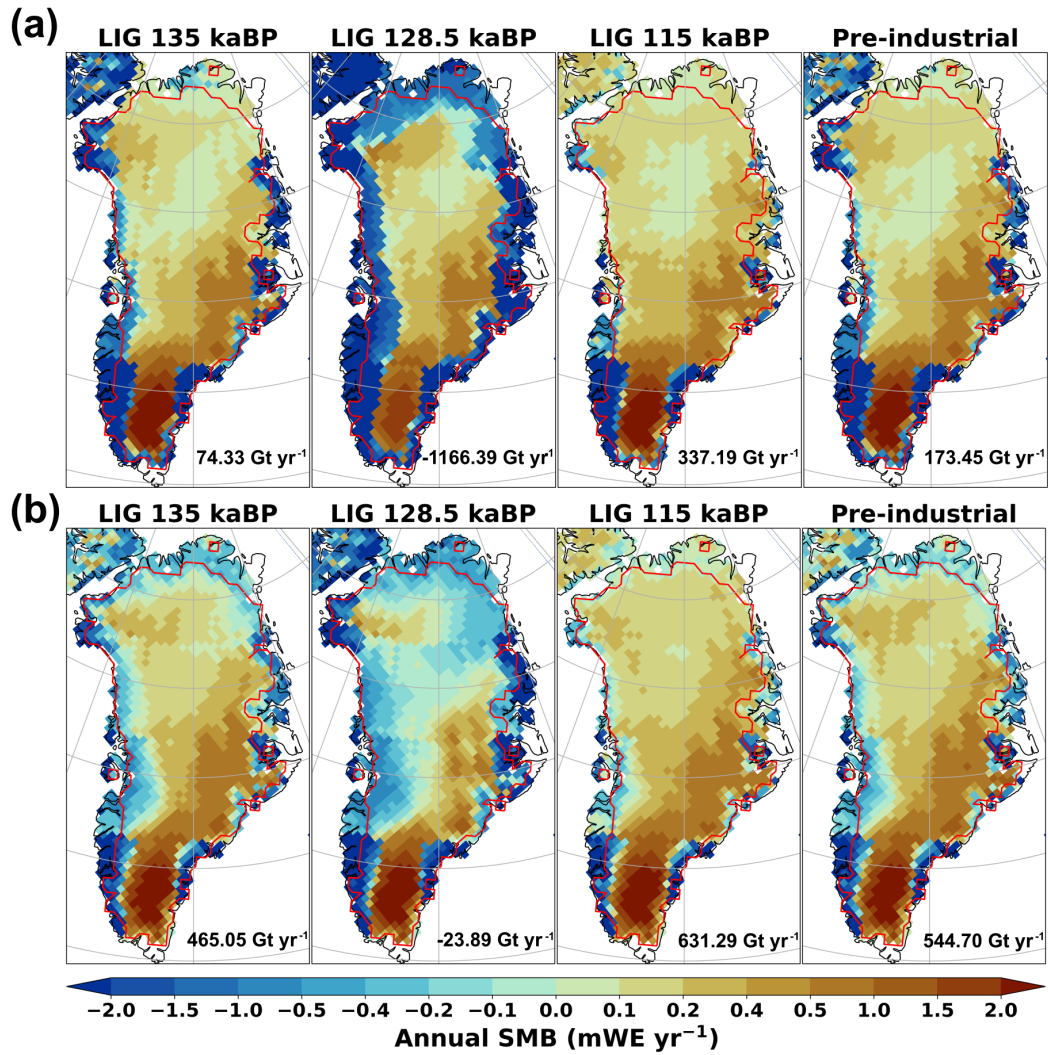

**Figure S8.** Annual mean SMB (in mWE yr<sup>-1</sup>) of several LIG time slices (135, 128.5 and 115 kaBP) and the pre-industrial simulation of (a) BESSI-*i*LOVECLIM and (b) ITM-*i*LOVECLIM for Greenland Ice Sheet. The total SMB (Gt yr<sup>-1</sup>) integrated for the present-day ice sheet extent (red line) is also included.

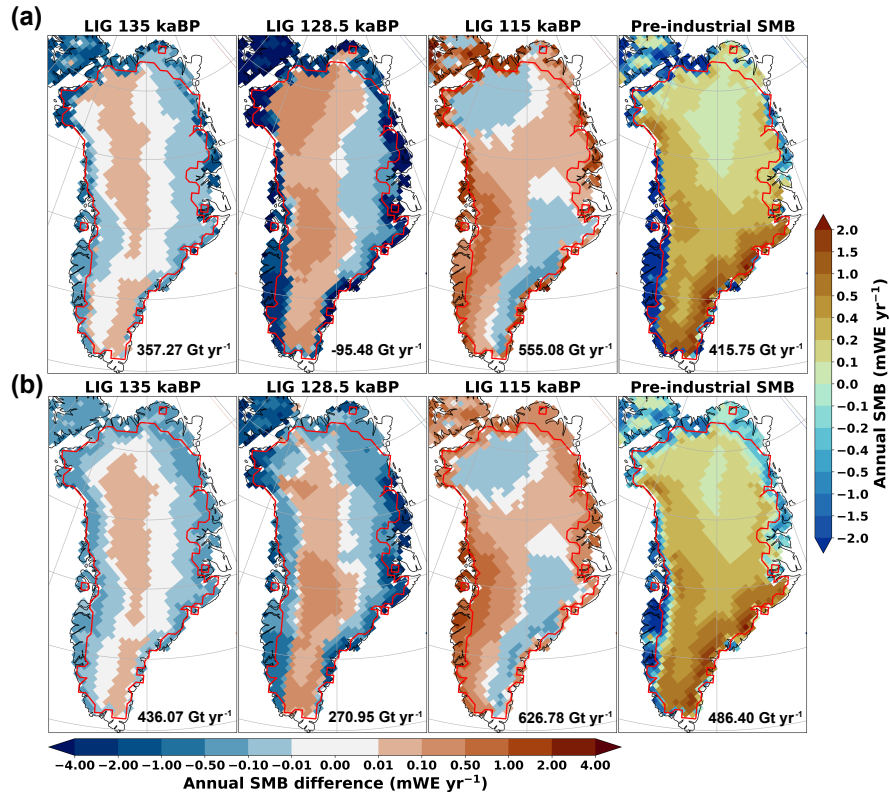

**Figure S9.** Annual mean SMB anomalies (in  $\text{mWE yr}^{-1}$ ) between several LIG time slices (135, 128.5 and 115 kaBP) and the pre-industrial simulation of (a) BESSI-*i*LOVECLIM and (b) ITM-*i*LOVECLIM after bias correction for Greenland Ice Sheet. The total SMB (Gt  $\text{yr}^{-1}$ ) integrated for the present-day ice sheet extent (red line) of each simulation is also included.



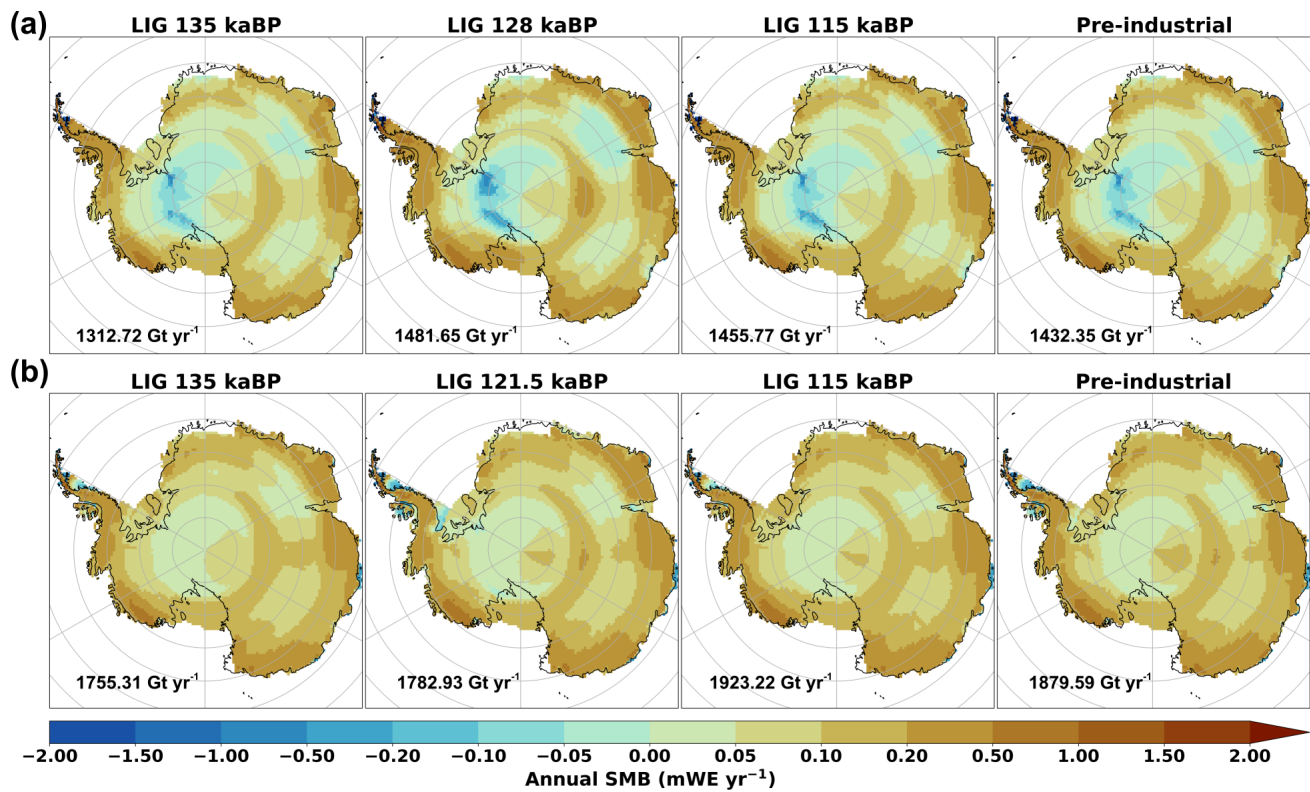

**Figure S10.** Annual mean SMB (in mWE yr<sup>-1</sup>) of several LIG time slices and the pre-industrial simulation of (a) BESSI-iLOVECLIM and (b) ITM-iLOVECLIM for Antarctic Ice Sheet. The total SMB (Gt yr<sup>-1</sup>) integrated for the present-day ice sheet extent is also included.

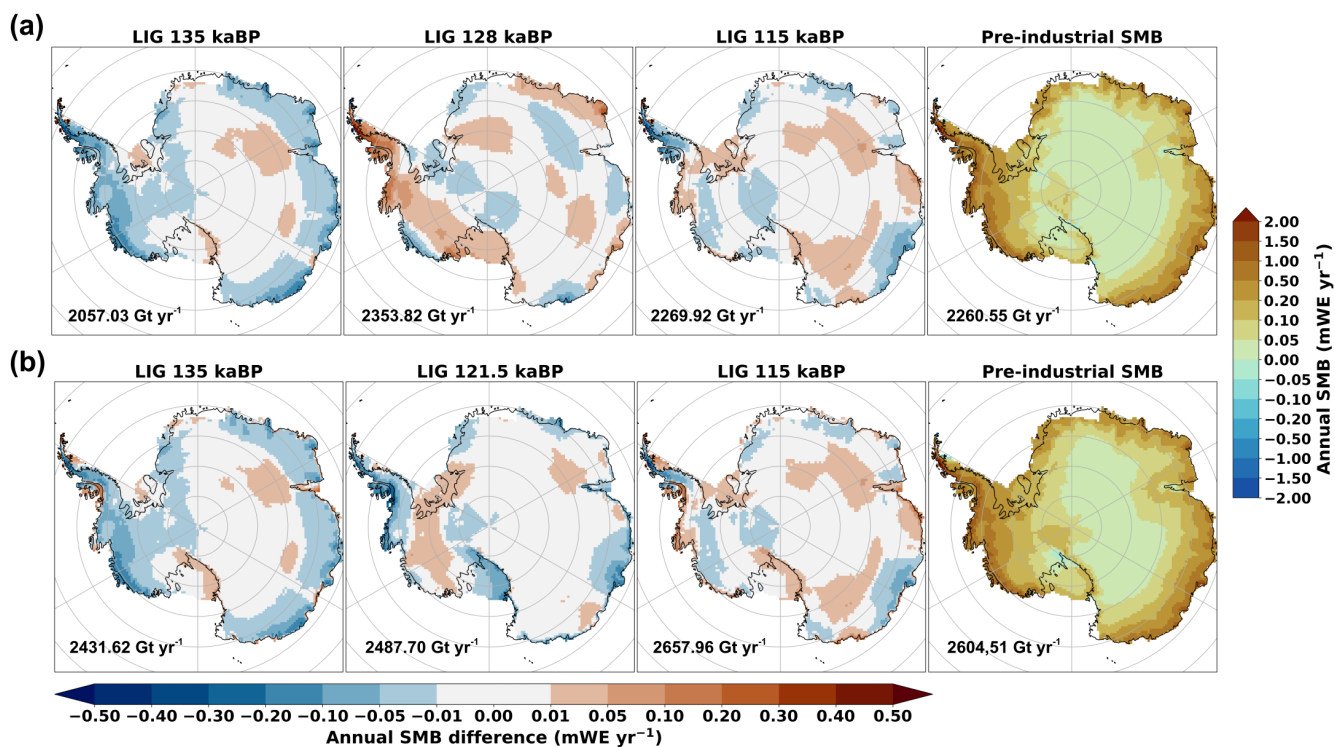

**Figure S11.** Annual mean SMB anomalies (in  $\text{mWE yr}^{-1}$ ) between several LIG time slices and the pre-industrial simulation of (a) BESSI-iLOVECLIM and (b) ITM-iLOVECLIM after bias correction for Antarctic Ice Sheet. The absolute annual SMB value of PI and the total SMB ( $\text{Gt yr}^{-1}$ ) integrated for the present-day ice sheet extent of each simulation are also included.



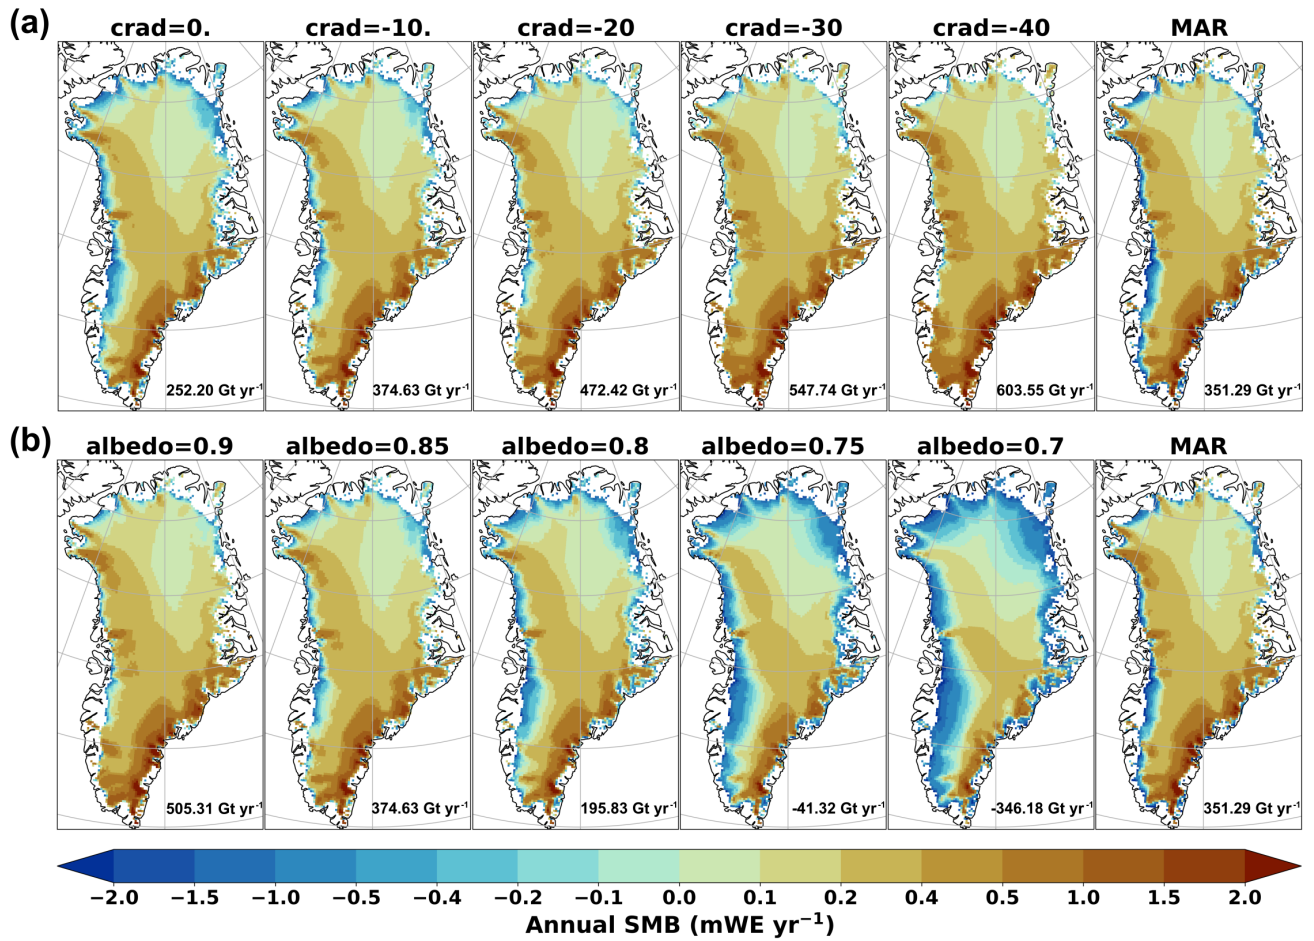

**Figure S12.** Annual mean SMB values (in mWE yr<sup>-1</sup>) of ITM-MAR compared to MAR for different cases: (a) crad changes and (b) albedo changes.
